# Supplementary material for: Targeting myocyte-specific enhancer factor 2D contributes to the suppression of cardiac hypertrophic growth by miR-92b-3p in mice
Source: PubMed Central journal article supplement (PMC5696165; doi:10.18632/oncotarget.20759), 2017-09-08
Supplement: oncotarget-08-92079-s001.pdf [file oncotarget-08-92079-s001.pdf]

## Targeting myocyte-specific enhancer factor 2D contributes to the suppression of cardiac hypertrophic growth by miR-92b-3p in mice

### SUPPLEMENTARY MATERIALS

Supplementary Table 1: Primers used in qRT-PCR assay

| Gene         | Sequence (5'- 3')                                                                                                            | Product size (bp) |
|--------------|------------------------------------------------------------------------------------------------------------------------------|-------------------|
| <i>MEF2D</i> | F, CCTCCTTACCAGCCTTCAGT<br>R, CAGGGATGAGGTTGCTGAGA                                                                           | 198               |
| <i>GAPDH</i> | F, CAAGAAGGTGGTGAAGCAGG<br>R, CCACCCTGTTGCTGTAGCC                                                                            | 200               |
| miR-92b-3p   | RT, GTCGTATCCAGTGC GTGTCGTGGAGT<br>CGGCAATTGCACTGGATACGACGGAGGCCG<br>F, GTCCGCTATTGCACTCGTCCCGGCCTCC<br>R, GTGCGTGTCGTGGAGTC | 66                |
| U6           | RT, GTCGTATCCAGTGC GTGTCGTGGAGT<br>CGGCAATTGCACTGGATACGAC<br>F, GTCCGCGTGCTCGCTTCGGCAGC<br>R, GTGCGTGTCGTGGAGTC              | 160               |
